# Supplementary material for: Two Functional TP53 Genetic Variants and Predisposition to Keloid Scarring in Caucasians
Source: Hindawi journal article supplement (doi:10.1155/2019/6179063), 2019-11-13
Supplement: f1 [file 6179063.f1.pdf]

**Supplemental Table 1. Clinical characteristics of the keloid patients (n=86).**

| Variable                                            | Keloid patients<br>n (%) |
|-----------------------------------------------------|--------------------------|
| Family history of keloid<br>(first degree relative) | 10 (11.6)                |
| Females                                             | 69 (80.2)                |
| Multiple keloid scars                               | 26 (30.2)                |
| Etiology of keloid scars:                           |                          |
| Postoperative complication                          | 47 (54.6)                |
| Posttraumatic complication                          | 9 (10.5)                 |
| Burning                                             | 9 (10.5)                 |
| Piercing ear                                        | 5 (5.8)                  |
| Vaccination                                         | 2 (2.3)                  |
| Insect bite                                         | 2 (2.3)                  |
| Unknown                                             | 12 (14.0)                |
| Location of keloid scars:                           |                          |
| Head and neck                                       | 28 (26.4)                |
| Chest                                               | 23 (21.7)                |
| Back                                                | 10 (9.4)                 |
| Abdomen                                             | 13 (12.3)                |
| Extremities                                         | 32 (30.2)                |
| Total *                                             | 106 (100.0)              |

\* Due to multilocality of keloid scars in some patients, number of keloid location is higher than the number of studied subjects.
